# Supplementary material for: Double insertion of CO2 into an Al–Te multiple bond
Source: Royal Society of Chemistry journal article supplement (doi:10.1039/d0cc07448a), 2021-01-01
Supplement: d0cc07448a1.pdf [file d0cc07448a1.pdf]

Supporting Information for:

## Double insertion of CO<sub>2</sub> into an Al–Te multiple bond

Matthew J. Evans,<sup>†</sup> Mathew D. Anker,<sup>\*,†</sup> Claire L. McMullin,<sup>\*,‡</sup> Nasir A. Rajab<sup>‡</sup> and Martyn P. Coles<sup>\*,†</sup>

<sup>†</sup> School of Chemical and Physical Sciences, Victoria University of Wellington, P.O. Box 600, Wellington, New Zealand.

<sup>‡</sup> Department of Chemistry, University of Bath, Bath, BA2 7AY, UK.

### Table of Contents:

|     |                                                                                                                                                                                       |
|-----|---------------------------------------------------------------------------------------------------------------------------------------------------------------------------------------|
| S2  | General Experimental Procedures                                                                                                                                                       |
|     | Synthesis of K[Al(NON <sup>Dipp</sup> )(Te)(THF)] (K[ <b>1-Te</b> ·THF])                                                                                                              |
| S3  | <b>Figure S1</b> <sup>1</sup> H NMR spectrum of K[Al(NON <sup>Dipp</sup> )(Te)(THF)] (K[ <b>1-Te</b> ·THF])                                                                           |
| S4  | <b>Figure S2</b> <sup>13</sup> C{ <sup>1</sup> H} NMR spectrum of K[Al(NON <sup>Dipp</sup> )(Te)(THF)] (K[ <b>1-Te</b> ·THF])                                                         |
| S5  | <b>Figure S3</b> ORTEP of K[Al(NON <sup>Dipp</sup> )(Te)(THF)] (K[ <b>1-Te</b> ·THF])                                                                                                 |
| S6  | <b>Figure S4</b> Section of the polymeric chain of (K[ <b>1-Te</b> ·THF])                                                                                                             |
| S7  | Synthesis of [K(Et <sub>2</sub> O) <sub>3</sub> ][Al(NON <sup>Dipp</sup> )(Te{ <sup>13</sup> C(O)O} <sub>2</sub> )] ( <b>2</b> )                                                      |
| S8  | <b>Figure S5</b> <sup>1</sup> H NMR spectrum of [K(Et <sub>2</sub> O) <sub>3</sub> ][Al(NON <sup>Dipp</sup> )(Te{ <sup>13</sup> C(O)O} <sub>2</sub> )] ( <b>2</b> )                   |
| S9  | <b>Figure S6</b> <sup>13</sup> C{ <sup>1</sup> H} NMR spectrum of [K(Et <sub>2</sub> O) <sub>3</sub> ][Al(NON <sup>Dipp</sup> )(Te{ <sup>13</sup> C(O)O} <sub>2</sub> )] ( <b>2</b> ) |
| S10 | <b>Figure S7</b> Expansion showing <sup>1</sup> J <sub>TeC</sub> for ( <b>2</b> )                                                                                                     |
| S11 | <b>Figure S8</b> <sup>125</sup> Te NMR spectrum of [K(Et <sub>2</sub> O) <sub>3</sub> ][Al(NON <sup>Dipp</sup> )(Te{ <sup>13</sup> C(O)O} <sub>2</sub> )] ( <b>2</b> )                |
| S12 | <b>Figure S9</b> <sup>13</sup> C{ <sup>1</sup> H} NMR spectra of reaction of K[Al(NON <sup>Dipp</sup> )(Te)(THF)] ( <b>2</b> ) with <sup>13</sup> CO <sub>2</sub>                     |
| S13 | <b>Figure S10</b> Expansion showing <sup>1</sup> J <sub>TeC</sub> for intermediate in the formation of ( <b>2</b> )                                                                   |
| S14 | <b>Figure S11</b> ORTEP of [K(Et <sub>2</sub> O) <sub>3</sub> ][Al(NON <sup>Dipp</sup> )(Te{ <sup>13</sup> C(O)O} <sub>2</sub> )] ( <b>2</b> )                                        |
| S15 | Crystallographic details                                                                                                                                                              |
| S16 | Computational methods                                                                                                                                                                 |
|     | <b>Figure S12</b> Resonance forms contributing to the Al=E bond                                                                                                                       |
| S17 | <b>Figure S13</b> Results from QTAIM analysis of [Al(NON <sup>Dipp</sup> )(E)] <sup>-</sup> anions                                                                                    |
| S18 | <b>Table S1</b> Summary of DFT results for the anions [Al(NON <sup>Dipp</sup> )(E)] <sup>-</sup>                                                                                      |
| S19 | <b>Table S2</b> Molecular Orbital Coefficients for HOMO and HOMO–1 of K[Al(NON <sup>Dipp</sup> )(E)]                                                                                  |
| S20 | References                                                                                                                                                                            |
| S21 | Cartesian coordinates and computed energies of [ <b>1-O</b> ] <sup>-</sup> , [ <b>1-Se</b> ] <sup>-</sup> and [ <b>1-Te</b> ] <sup>-</sup>                                            |

## General Experimental Procedures.

All manipulations were performed under dry nitrogen using standard Schlenk-line techniques, or in a conventional nitrogen-filled glovebox. Solvents were dried over appropriate drying agents and degassed prior to use. NMR spectra were recorded using a Jeol JNM-ECZ500S 500 MHz spectrometer equipped with a ROYAL digital auto tune probe S, operating at 500.1 ( $^1\text{H}$ ), 125.7 ( $^{13}\text{C}\{^1\text{H}\}$ ), 95.4 ( $^{77}\text{Se}$ ) and 157.8 ( $^{125}\text{Te}$ ) MHz. Spectra were recorded at 298 K (unless stated otherwise) and proton and carbon chemical shifts were referenced internally to residual solvent resonances. Coupling constants are quoted in Hz.  $\text{K}[\text{Al}(\text{NON}^{\text{Dipp}})]$  (**A**),<sup>S1</sup> was prepared according to the literature procedure. All other chemicals were purchased from Sigma-Aldrich and used without further purification.

### Synthesis of $\text{K}[\text{Al}(\text{NON}^{\text{Dipp}})(\text{Te})(\text{THF})]$ , ( $\text{K}[1\text{-Te}\cdot\text{THF}]$ )

A catalytic amount of tri-*n*-butylphosphine (<0.1 mL) was added to a stirred slurry of tellurium (40 mg, 0.31 mmol) in toluene. A toluene solution of  $\text{K}[\text{Al}(\text{NON}^{\text{Dipp}})]$  (**A**) (172 mg, 0.31 mmol) was added drop wise to the tellurium/phosphine mixture at room temperature and the solution stirred for 18 hours. The resulting suspension was allowed to settle, and the brown/green solution was decanted away to afford a white solid. The solid was washed using hexane and recrystallized from THF at room temperature to yield colourless crystals  $\text{K}[1\text{-Te}\cdot\text{THF}]$ . Yield 76 mg, 32.4 %. It was not possible to obtain accurate elemental analysis for this compound due to its extreme sensitivity to oxygen, moisture and possibly light. Samples prepared for analysis and flame-sealed under vacuum in a glass ampoule visibly changed colour from white to grey over a 4-day period, indicating decomposition.  $^1\text{H}$  NMR ( $\text{THF-}d_8$ ):  $\delta$  6.97 (d,  $J = 7.9$ , 3H,  $\text{C}_6\text{H}_3$ ), 6.90 (t,  $J = 6.8$ , 2H,  $\text{C}_6\text{H}_3$ ), 3.78 (sept,  $J = 6.7$ , 4H,  $\text{CHMe}_2$ ), 1.38 (d,  $J = 6.8$ , 12H,  $\text{CHMe}_2$ ), 1.19 (d,  $J = 6.8$ , 12H,  $\text{CHMe}_2$ ), 0.02 (s, 12H,  $\text{SiMe}_2$ ).  $^{13}\text{C}\{^1\text{H}\}$  ( $\text{THF-}d_8$ ):  $\delta$  147.7, 145.5, 123.7, 123.2 ( $\text{C}_6\text{H}_3$ ), 28.7 ( $\text{CHMe}_2$ ), 26.9, 24.8 ( $\text{CHMe}_2$ ), 2.8 ( $\text{SiMe}_2$ ).

Figure S1  $^1\text{H}$  NMR spectrum (500 MHz,  $\text{THF-d}_8$ , 298 K) of  $\text{K}[\text{Al}(\text{NON}^{\text{Dipp}})(\text{Te})(\text{THF})]$  ( $\text{K}[\mathbf{1}\text{-Te}\cdot\text{THF}]$ )

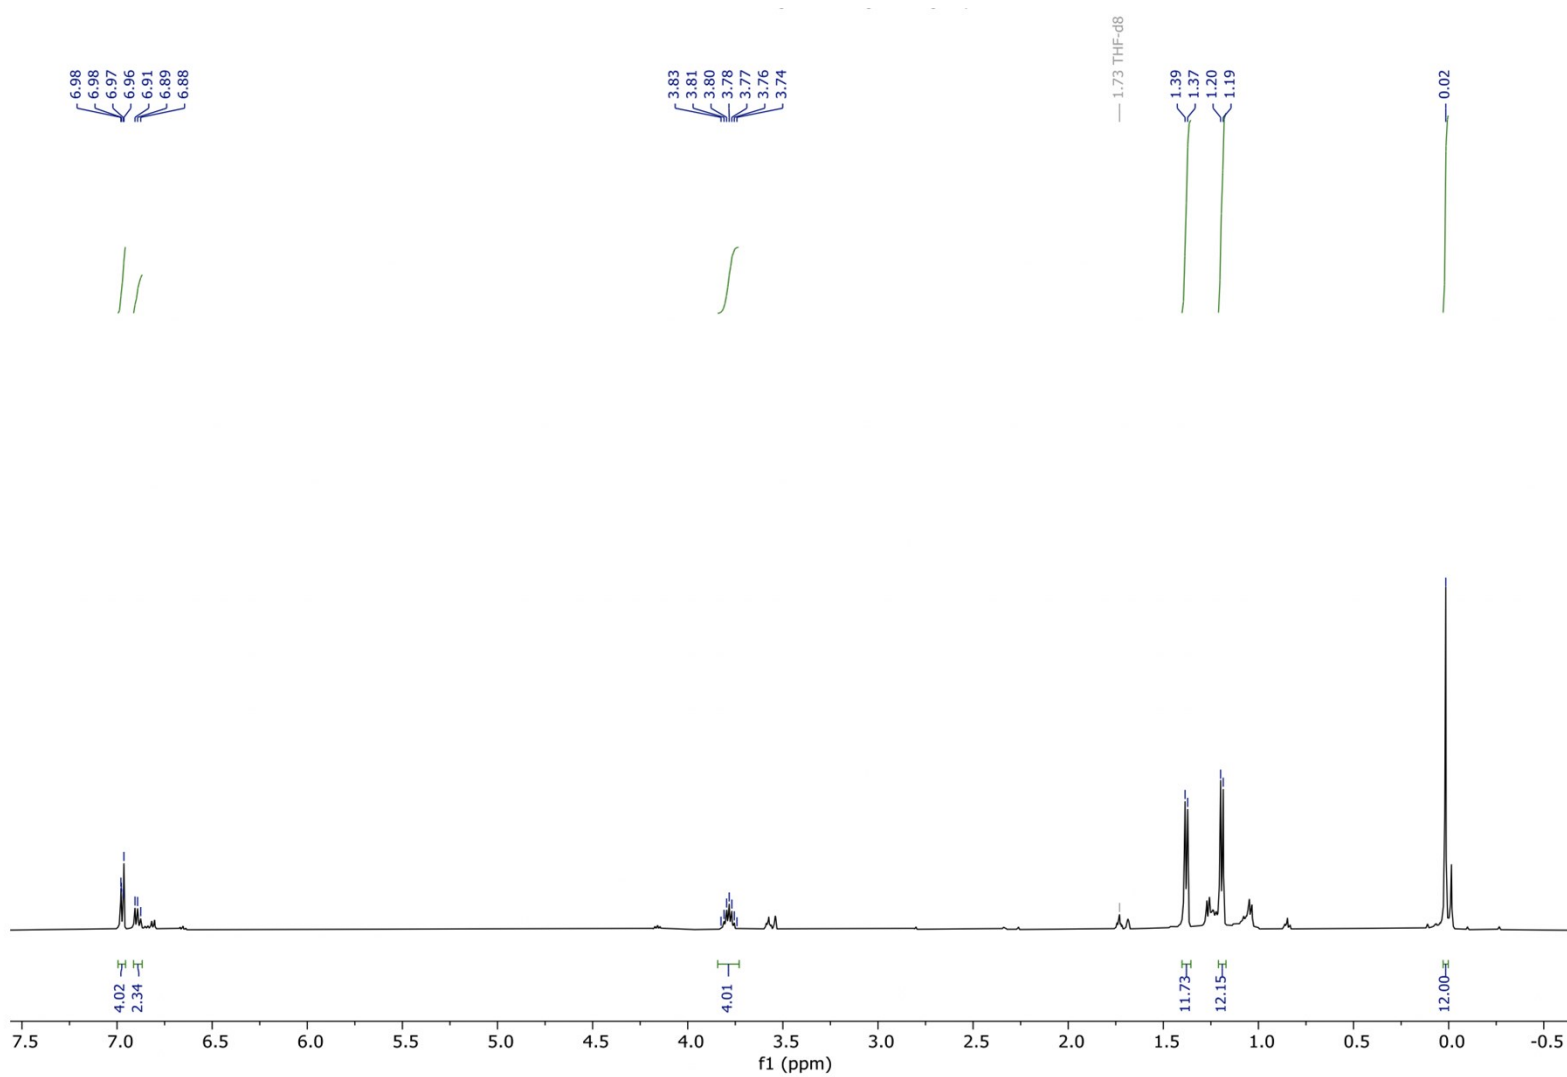

**Figure S2**  $^{13}\text{C}\{^1\text{H}\}$  NMR spectrum (125 MHz,  $\text{THF-}d_8$ , 298 K) of  $\text{K}[\text{Al}(\text{NON}^{\text{Dipp}})(\text{Te})(\text{THF})]$  ( $\text{K}[\mathbf{1}\text{-Te}\cdot\text{THF}]$ )

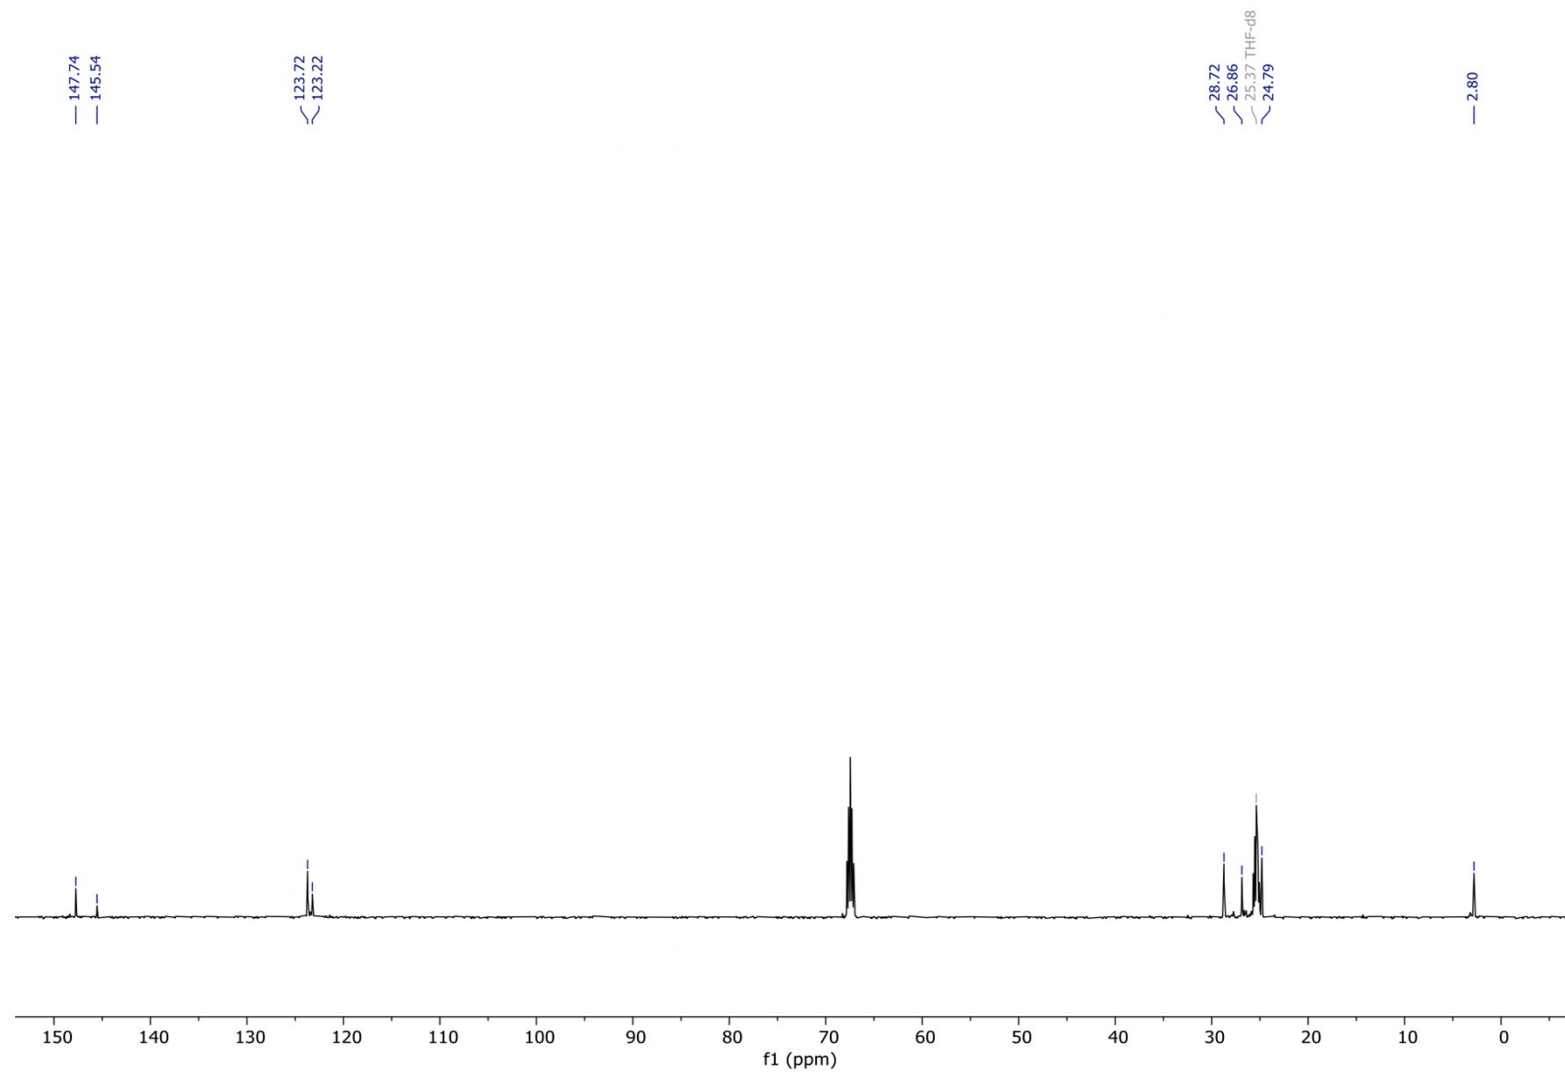

**Figure S3** ORTEP (displacement ellipsoids 30 %) of  $K[Al(NON^{Dipp})(Te)(THF)]$  ( $K[1-Te \cdot THF]$ )

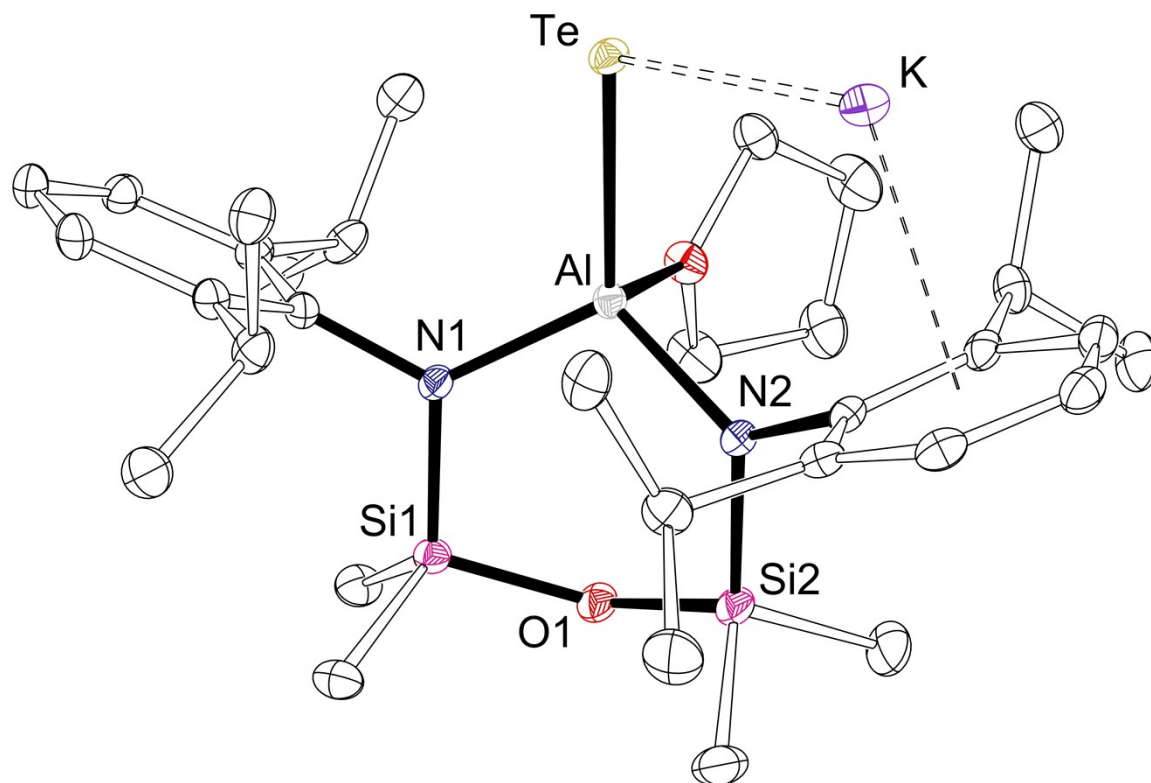

**Figure S4** Section of the polymeric chain of (K[1-Te·THF]). ' =  $1.5-x, 0.5+y, 0.5-z$ ; '' =  $1.5-x, -0.5+y, 0.5-z$ .

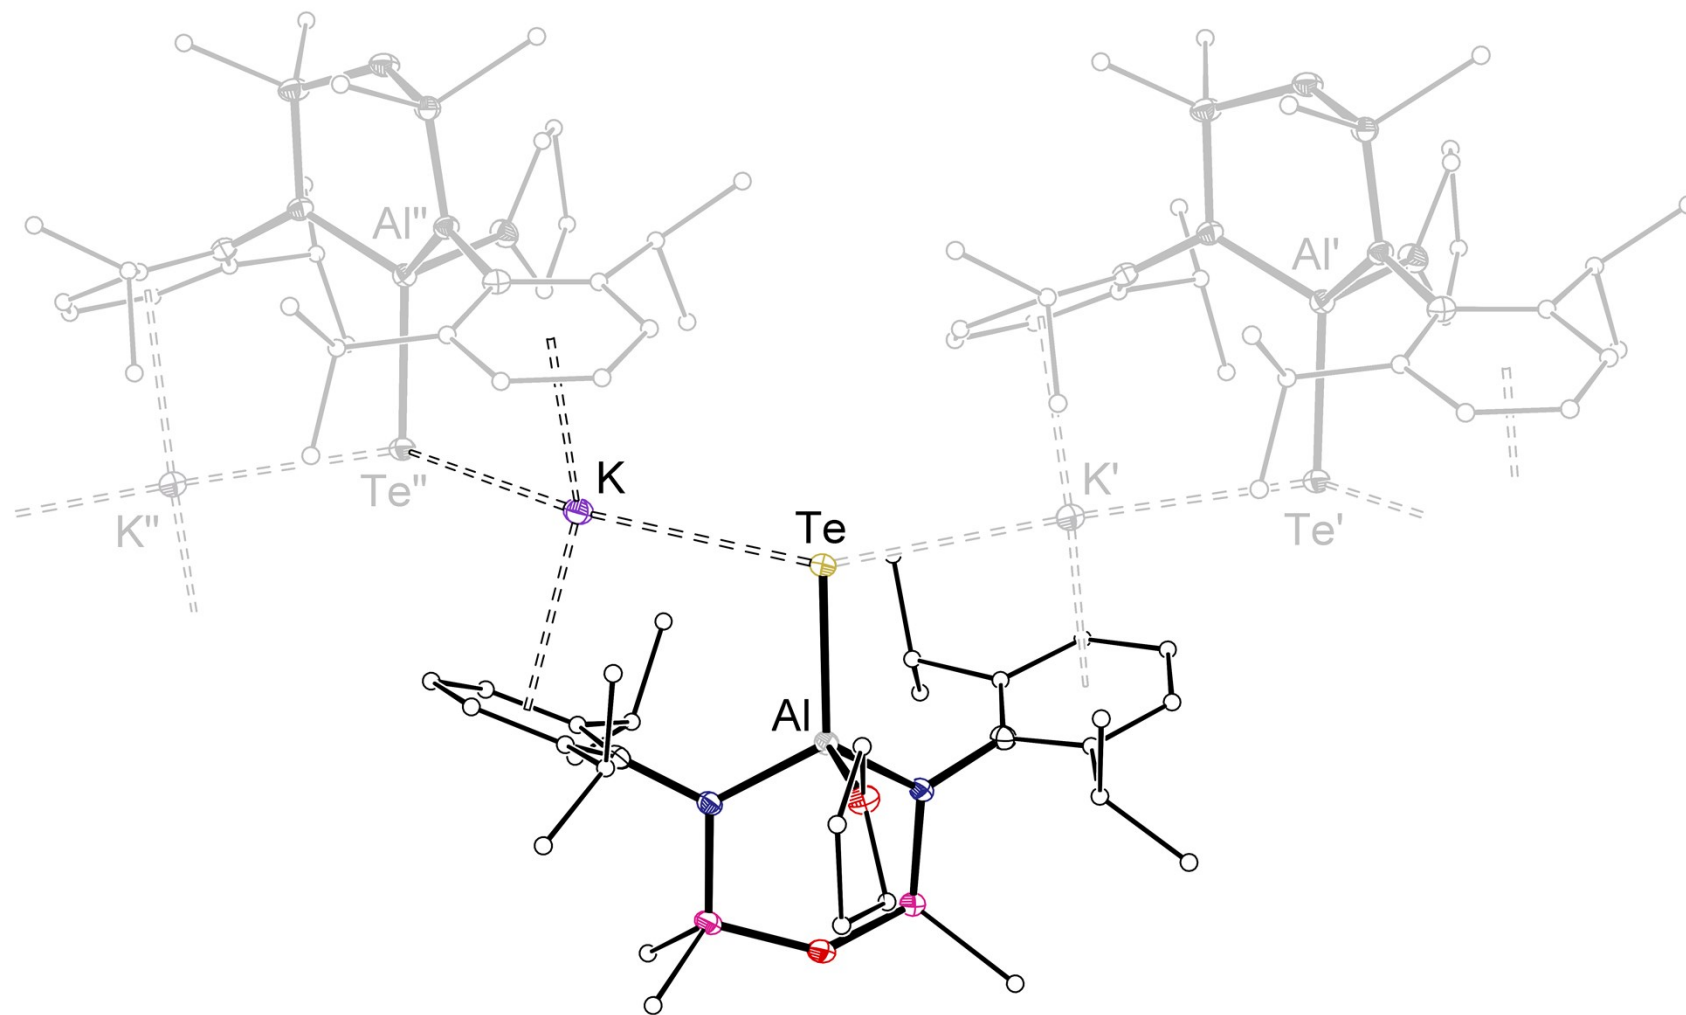

### Synthesis of $[K(Et_2O)_3][Al(NON^{DiPP})(Te\{C(O)O\}_2)]$ (2).

A solution of  $K[1-Te\cdot THF]$  (80 mg, 0.11 mmol) was prepared in a 50:1 mixture of THF: $C_6D_6$  and added to a J. Youngs NMR tube. The THF/ $C_6D_6$  solution was degassed and one atmosphere of  $CO_2$  was added to the reaction vessel at room temperature. Reaction progress was monitored by  $^1H$  and  $^{13}C\{^1H\}$  NMR spectroscopy and shown to be complete within 2 days at room temperature. The volatiles were removed *in vacuo* and the brown residue dissolved in  $Et_2O$ . Filtration through celite gave a yellow solution, from which colourless crystals were grown at  $-30\text{ }^\circ C$ . Yield 15 mg, 18.3 %. Samples of the crystals stored in the dark in a nitrogen filled glovebox at  $-30\text{ }^\circ C$  decomposed over 3 days, indicating extreme instability that precluded the preparation of samples for elemental analysis.  $^1H$  NMR (500 MHz, THF- $d_8$ ):  $\delta$  6.89 (d,  $J = 7.5$ , 4H,  $C_6H_3$ ), 6.78 (t,  $J = 7.5$ , 2H,  $C_6H_3$ ), 3.91 (sept,  $J = 6.8$ , 4H,  $CHMe_2$ ), 1.26 (d,  $J = 6.8$ , 12H,  $CHMe_2$ ), 1.12 (d,  $J = 6.8$ , 12H,  $CHMe_2$ ), 0.08 (s, 12H,  $SiMe_2$ ).  $^{13}C\{^1H\}$  NMR (126 MHz, THF- $d_8$ ):  $\delta$  164.5, 157.2 ( $C_6H_3$ ), 155.0 ( $J_{Te-C} = 327$ ,  $Te\{^{13}C(O)O\}_2$ ), 147.5, 123.7 ( $C_6H_3$ ), 28.0 ( $CHMe_2$ ), 26.3, 26.2 ( $CHMe_2$ ), 2.7 ( $SiMe_2$ ).  $^{125}Te$  NMR (158 MHz, THF):  $\delta -17.8$  (d,  $J_{Te-C} = 327$ ,  $Te\{C(O)O\}_2$ ).

**Figure S5**  $^1\text{H}$  NMR spectrum (500 MHz,  $\text{THF-}d_8$ , 298 K) of  $[\text{K}(\text{Et}_2\text{O})_3][\text{Al}(\text{NON}^{\text{Dipp}})(\text{Te}\{^{13}\text{C}(\text{O})\text{O}\}_2)]$  (**2**)

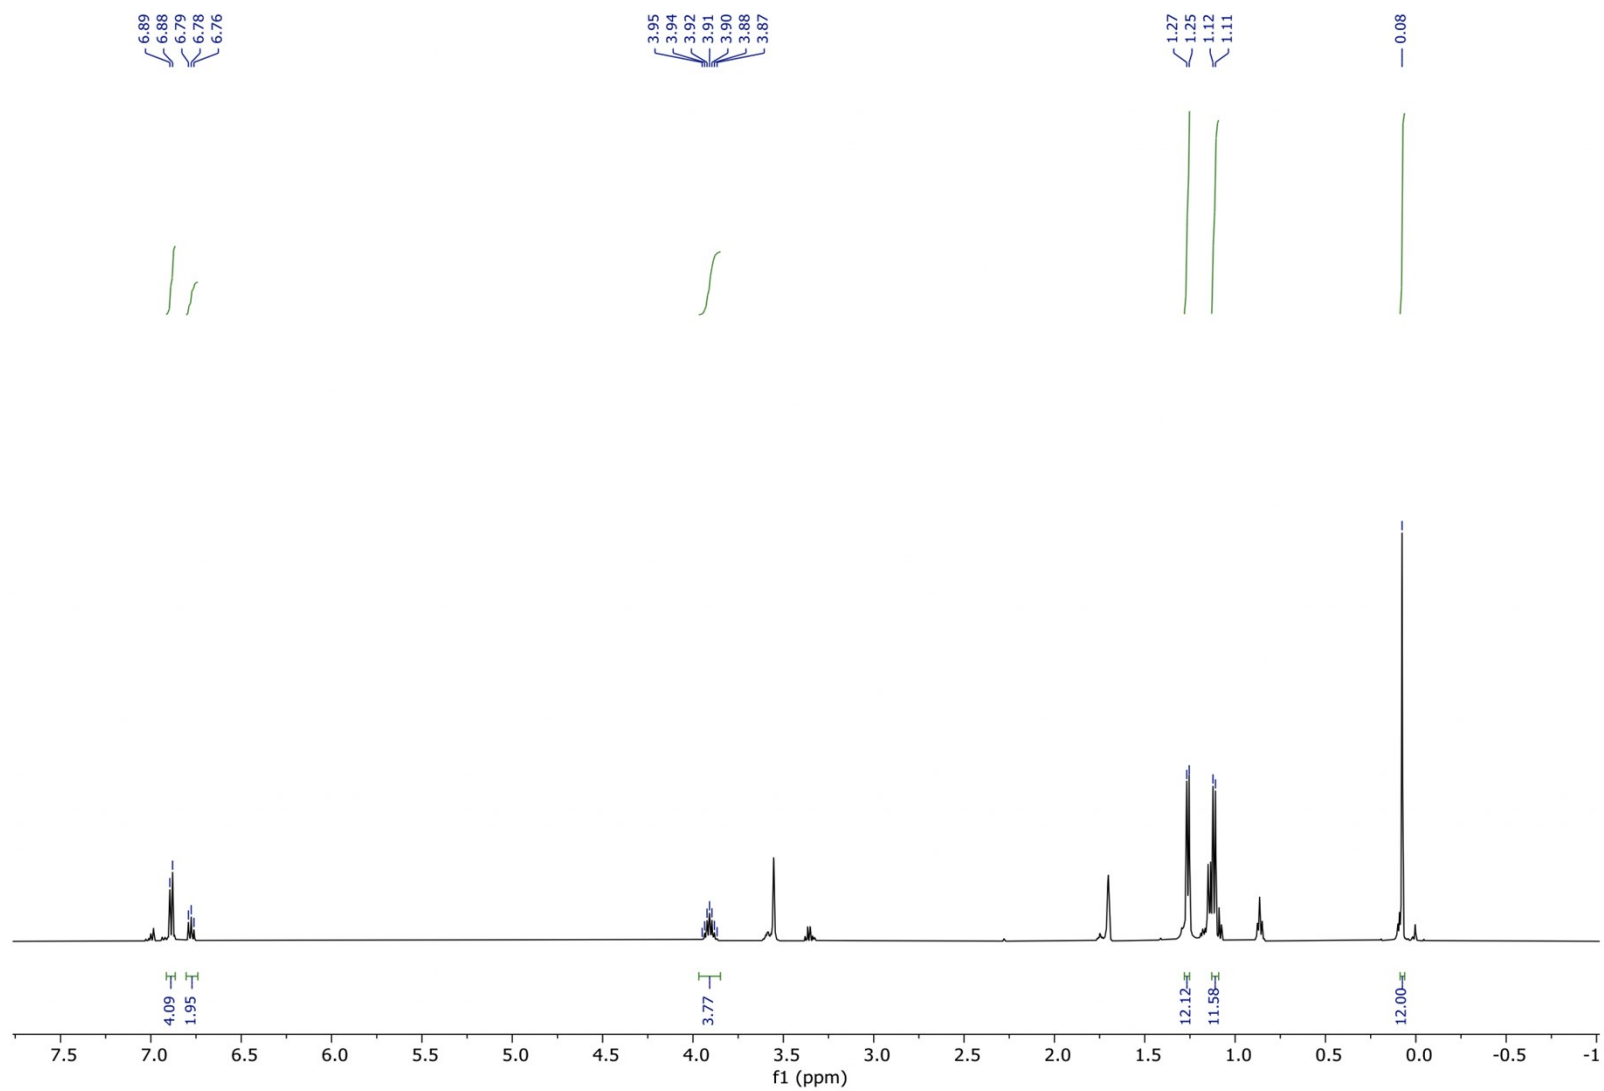



**Figure S6**  $^{13}\text{C}\{^1\text{H}\}$  NMR spectrum (125 MHz,  $\text{THF-}d_8$ , 298 K) of  $[\text{K}(\text{Et}_2\text{O})_3][\text{Al}(\text{NON}^{\text{Dipp}})(\text{Te}\{^{13}\text{C}(\text{O})\text{O}\}_2)]$  (**2**)

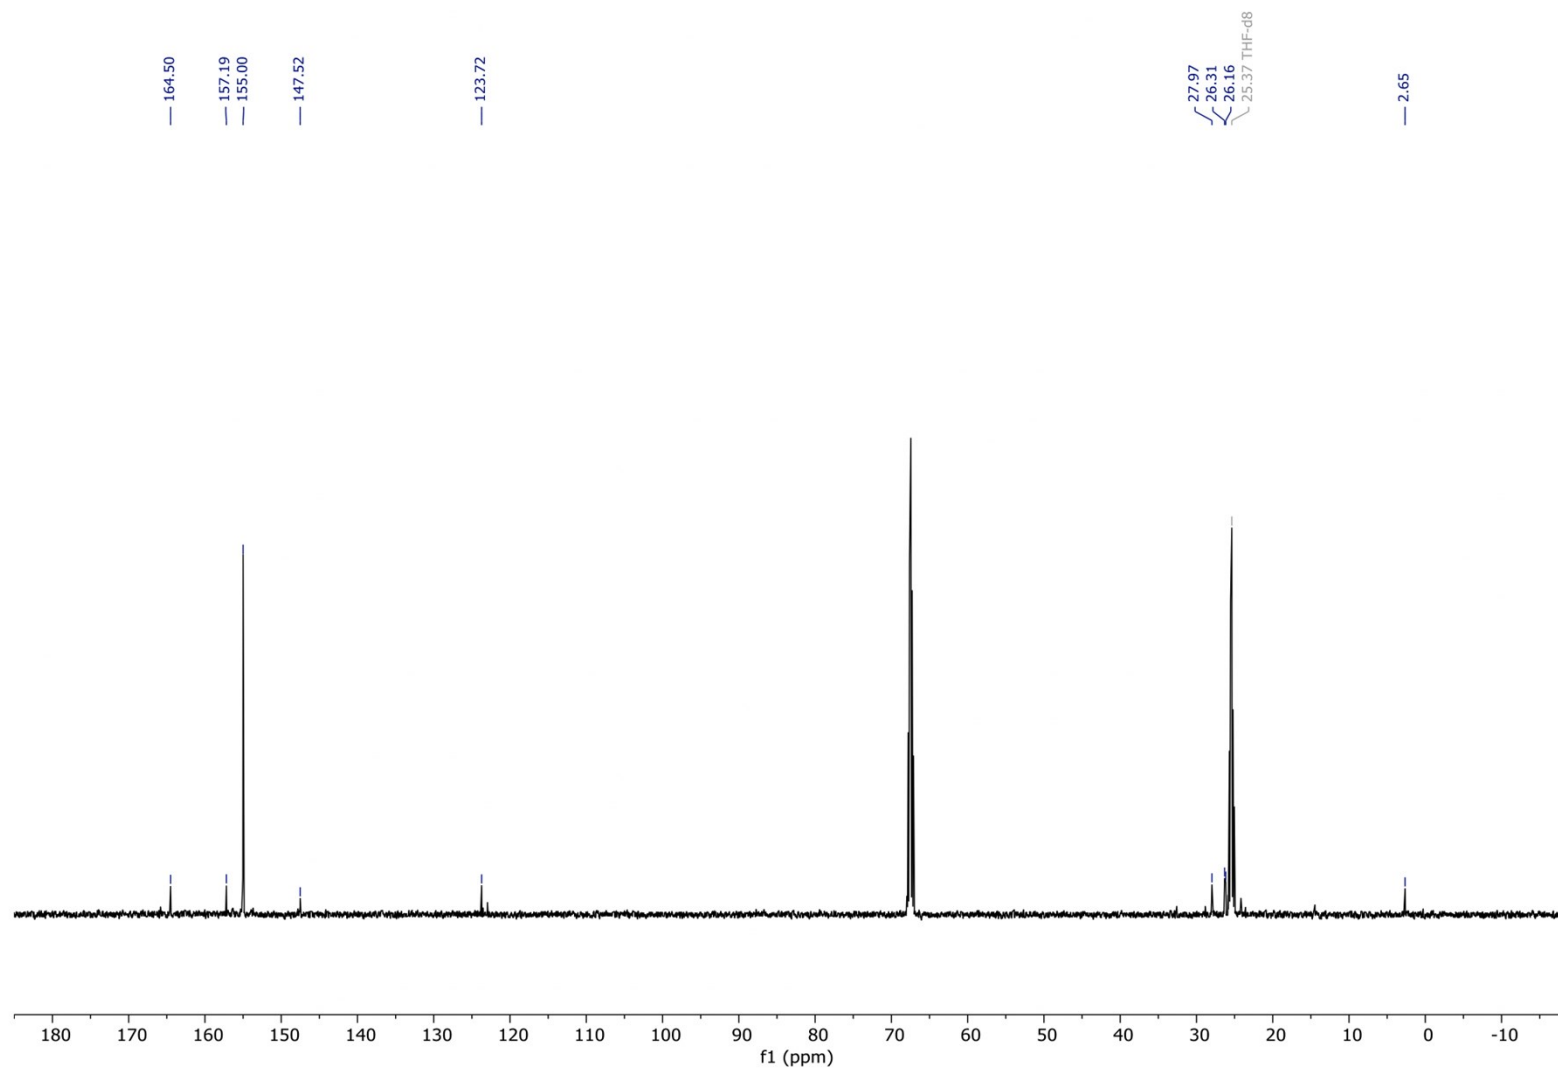

**Figure S7** Expansion of  $^{13}\text{C}\{^1\text{H}\}$   $[\text{Te}^{13}\text{C}(\text{O})\text{O}]_2$  resonance from  $[\text{K}(\text{Et}_2\text{O})_3][\text{Al}(\text{NON}^{\text{Dipp}})(\text{Te}\{^{13}\text{C}(\text{O})\text{O}\}_2)]$  (**2**) showing  $^1J_{\text{TeC}}$  coupling

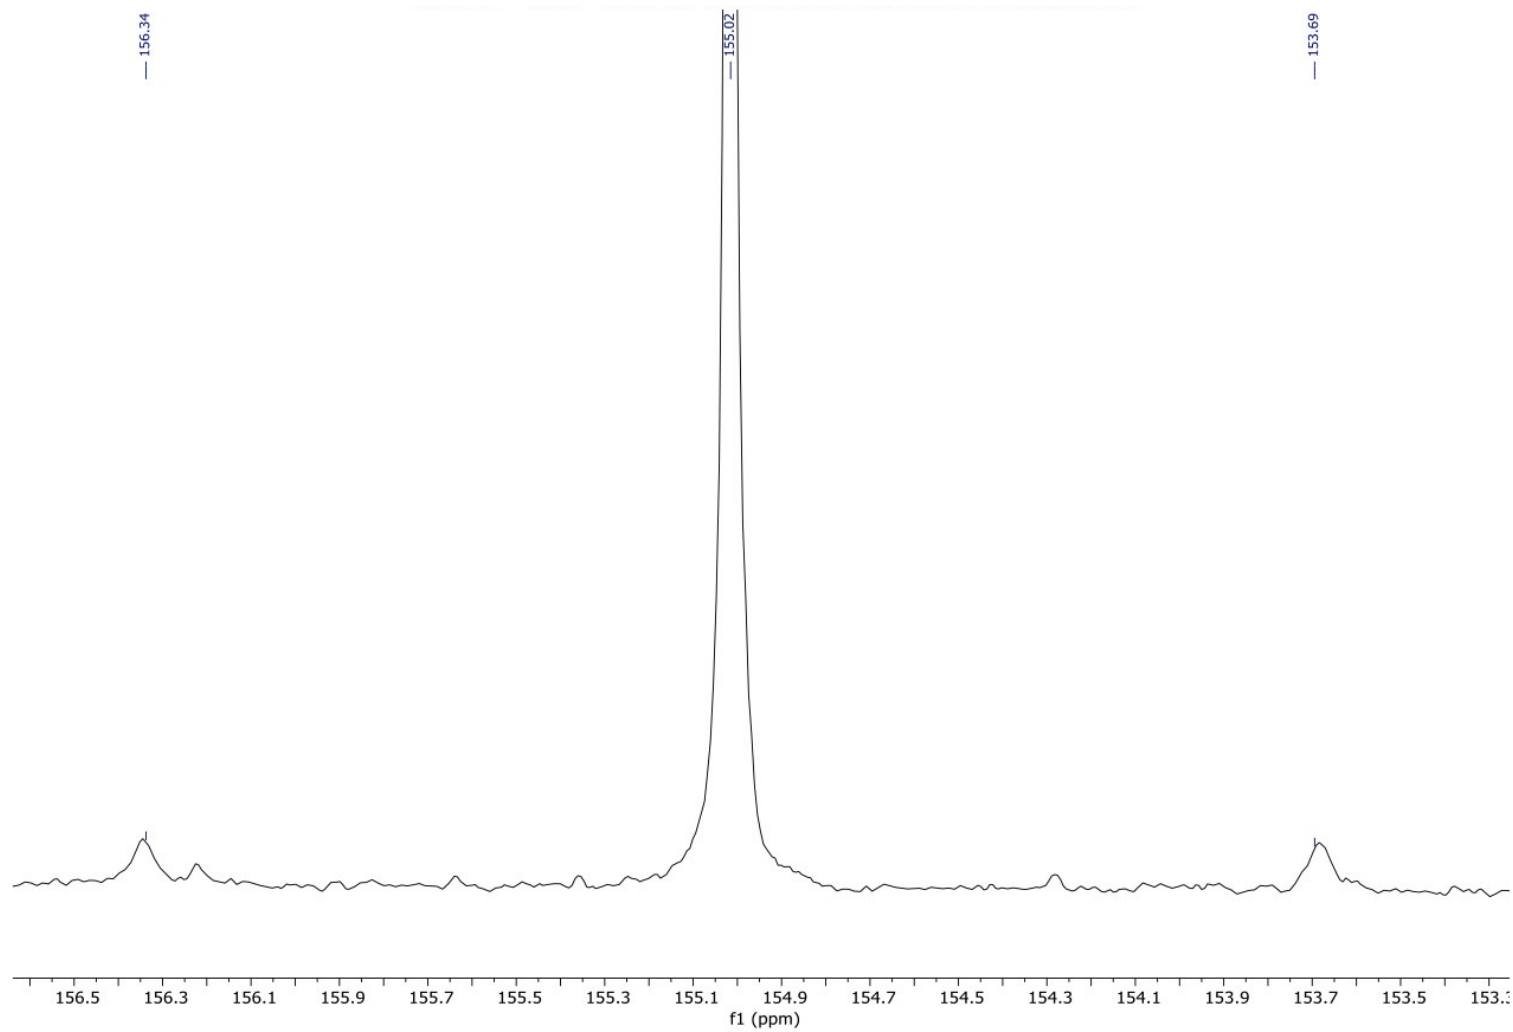

**Figure S8**  $^{125}\text{Te}$  NMR spectrum (158 MHz, THF- $d_8$ , 298 K) of  $[\text{K}(\text{Et}_2\text{O})_3][\text{Al}(\text{NON}^{\text{Dipp}})(\text{Te}^{13}\text{C}(\text{O})\text{O})_2]$  (**2**)

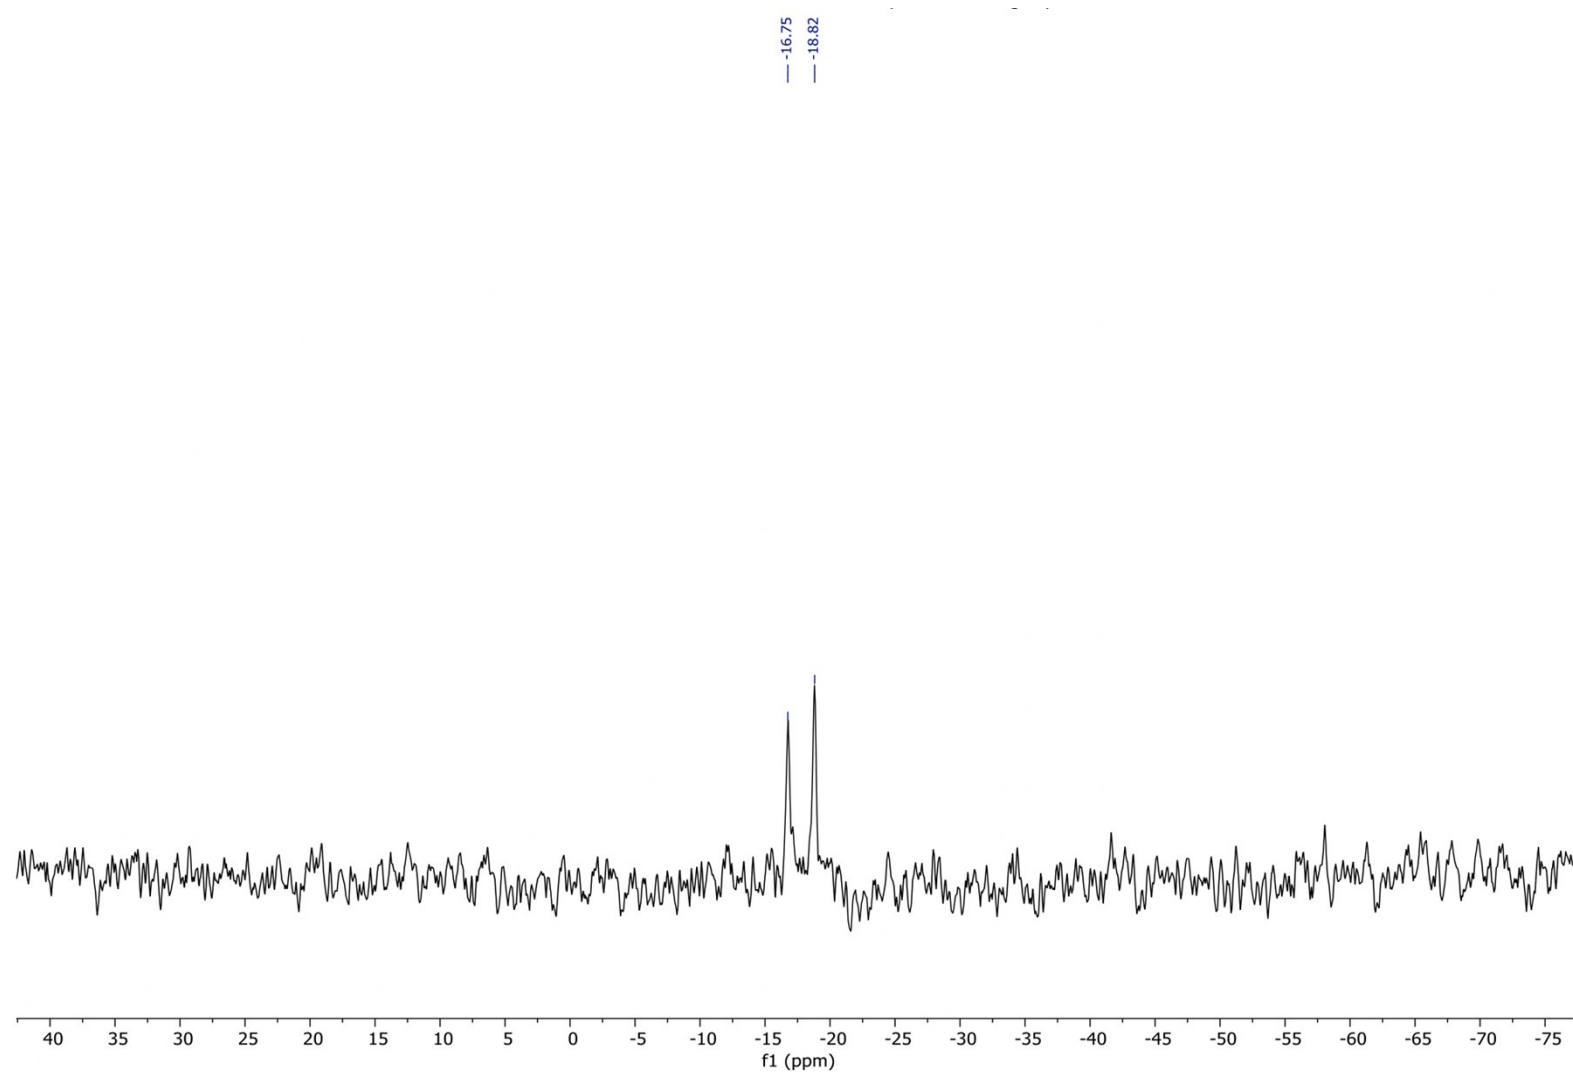

**Figure S9**  $^{13}\text{C}\{^1\text{H}\}$  NMR spectrum (125 MHz,  $\text{THF-}d_8$ , 298 K) of reaction of  $\text{K}[\text{Al}(\text{NON}^{\text{Dipp}})(\text{Te})(\text{THF})]$  ( $\text{K}[1\text{-Te}\cdot\text{THF}]$ ) with  $^{13}\text{CO}_2$  showing formation of intermediate at  $\delta_c$  142.1. Peak at  $\delta_c$  155.0 corresponds to  $[\text{Te}\{^{13}\text{C}(\text{O})\text{O}\}_2]$  resonance from  $[\text{K}(\text{Et}_2\text{O})_3][\text{Al}(\text{NON}^{\text{Dipp}})(\text{Te}\{^{13}\text{C}(\text{O})\text{O}\}_2)]$  (**2**)

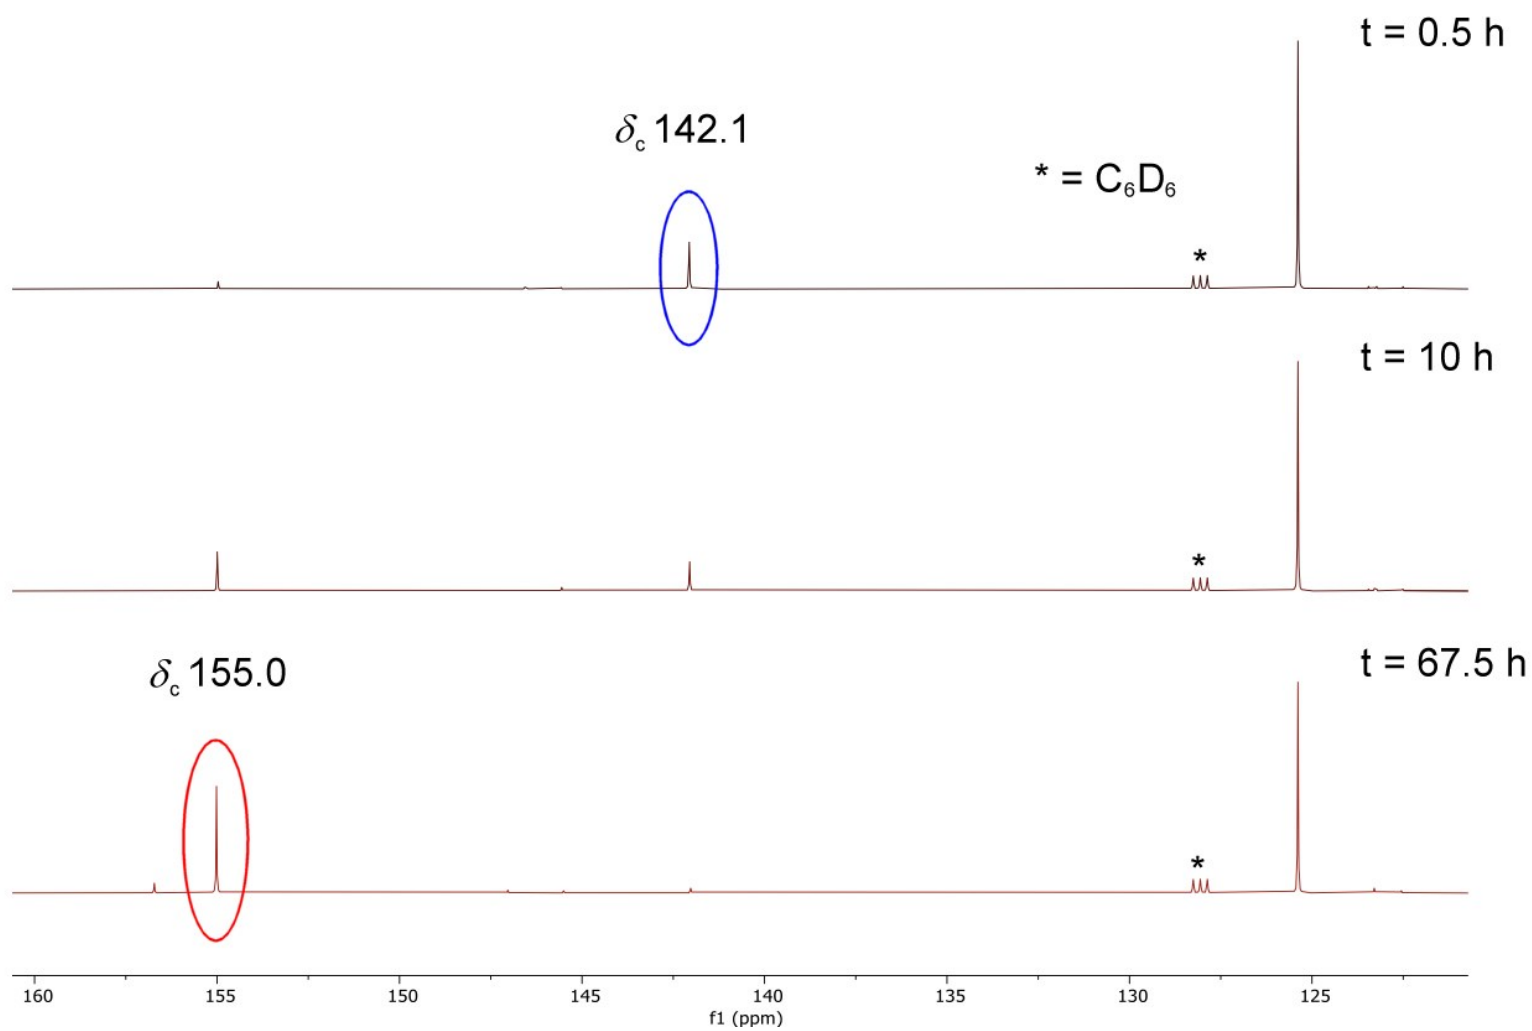

**Figure S10** Expansion of  $^{13}\text{C}\{^1\text{H}\}$  resonance at  $\delta_{\text{C}} 142.1$  showing  $^1J_{\text{TeC}}$  coupling

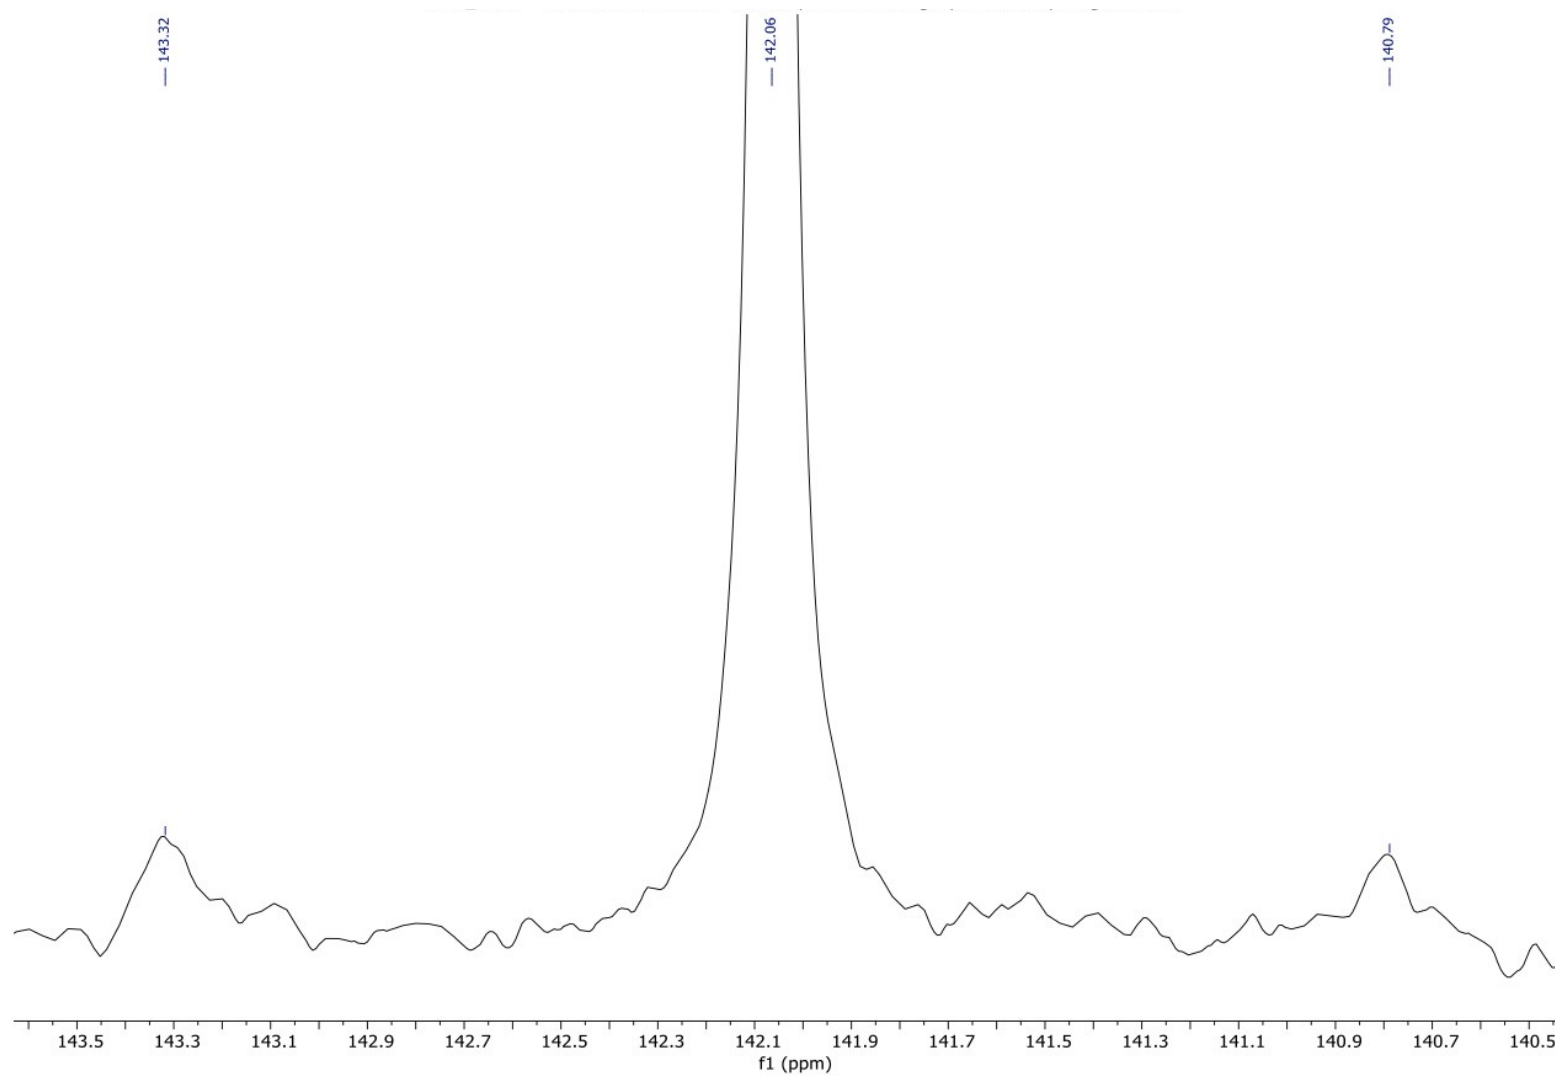

**Figure S11** ORTEP (displacement ellipsoids 30 %) of  $[K(Et_2O)_3][Al(NON^{Dipp})\{(OC(O)_2Te)\}][K(Et_2O)_2(THF)][Al(NON^{Dipp})\{(OC(O)_2Te)\}]$  (**2**)

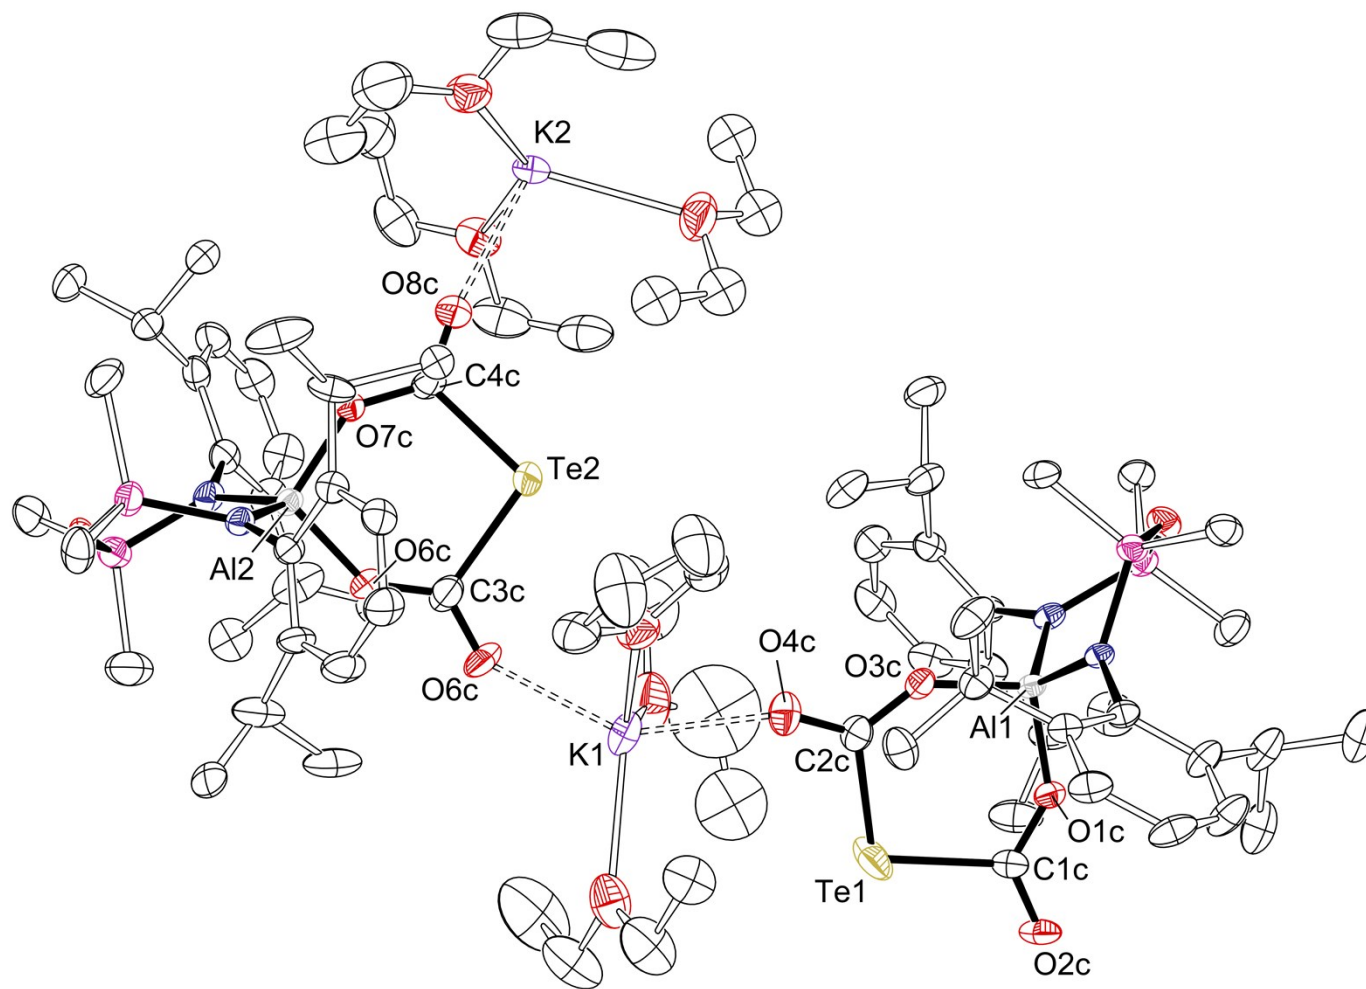

## Crystallographic Details

Crystals were covered in inert oil and suitable single crystals were selected under a microscope and mounted on an Agilent SuperNova diffractometer fitted with an EOS S2 detector. Data were collected at 120 K (unless indicated otherwise) using focused microsource Cu K $\alpha$  radiation at 1.54184 Å. Intensities were corrected for Lorentz and polarisation effects and for absorption using multi-scan methods.<sup>[S2]</sup> Space groups were determined from systematic absences and checked for higher symmetry. All structures were solved using direct methods with SHELXS,<sup>[S3]</sup> refined on  $F^2$  using all data by full matrix least-squares procedures with SHELXL-97,<sup>[S4]</sup> within the WinGX<sup>[S5]</sup> program. Non-hydrogen atoms were refined with anisotropic displacement parameters. Hydrogen atoms were placed in calculated positions or manually assigned from residual electron density where appropriate, unless otherwise stated. The functions minimized were  $\Sigma w(F_2o - F_2c)$ , with  $w = [\sigma^2(F_2o) + aP^2 + bP]^{-1}$ , where  $P = [\max(F_2o)^2 + 2F_2c]/3$ . The isotropic displacement parameters are 1.2 or 1.5 times the isotropic equivalent of their carrier atoms.

### Additional Details:

*K[Al(NON<sup>Dipp</sup>)(Te)(THF)] (K[1-Te·THF])*: The THF solvate is disordered and was modelled with a methylene and the oxygen located over two positions. All atoms were refined isotropically.

*[K(Et<sub>2</sub>O)<sub>3</sub>][Al(NON<sup>Dipp</sup>)(Te{<sup>13</sup>C(O)}<sub>2</sub>)] (2)*: Data was collected at 150 K. The crystals contained extensive disorder in the coordinated Et<sub>2</sub>O / THF molecules that also presents itself in the position of the tellurium atoms (that were each modelled over two positions). Although the coordinated Et<sub>2</sub>O / THF were modelled as well as could be against the diffraction data obtained, a considerable number of constraints and restraints were required to give a satisfactory model. The data unequivocally shows the connectivity of the complex, but caution should be exercised when discussing any bond lengths and angles.

## Computational Methods

DFT calculations were run with Gaussian 16 (A.03).<sup>[S6]</sup> The Al, Si, Se and Te centres were described with the Stuttgart RECPs and associated basis sets,<sup>[S7]</sup> and 6-31G\*\* basis sets were used for all other atoms (BS1).<sup>[S8]</sup> A polarization function was also added to Al ( $\zeta_d = 0.190$ ) and Si ( $\zeta_d = 0.284$ ), Se ( $\zeta_d = 0.364$ ) and Te ( $\zeta_d = 0.252$ ). Initial BP86<sup>[S9]</sup> optimizations were performed using the 'grid = ultrafine' option, with all stationary points being fully characterized via analytical frequency calculations as either minima (all positive eigenvalues) or transition states (one negative eigenvalue). The Quantum Theory of Atoms in Molecules (QTAIM, AIMALL program<sup>[S10]</sup>) and Natural Bonding Orbital (NBO3<sup>[S11]</sup>) analyses were performed on the BP86-optimised geometries of the  $[\text{Al}(\text{NON}^{\text{Dipp}})(\text{E})]^-$  anions.

**Figure S12** Resonance forms contributing to the Al=E bond

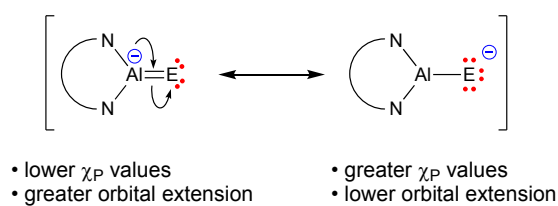



**Figure S13** QTAIM molecular graph of the BP86-optimised geometry of the  $[\text{Al}(\text{NON}^{\text{Dipp}})(\text{E})]^-$  anions. The electron density contours are computed in the  $\{\text{Al}/\text{E}/\text{N}\}$  planes with bond critical points (BCPs) shown as small red spheres.

E = oxygen

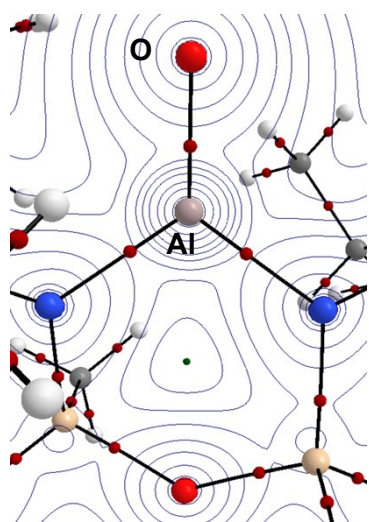

E = selenium

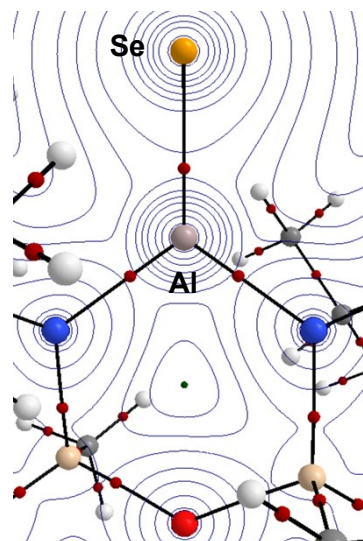

E = tellurium

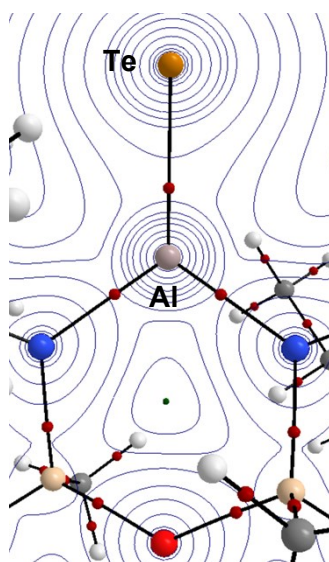

**Table S1** Summary of DFT results for the anions [Al(NON<sup>Dipp</sup>)(E)]<sup>-</sup>

| [Al(NON <sup>Dipp</sup> )(E)] <sup>-</sup>   | E = O                   | E = Se               | E = Te                 |
|----------------------------------------------|-------------------------|----------------------|------------------------|
| Al–E / Å (X-ray)                             | 1.6362(14) <sup>a</sup> | 2.2032(6)            | 2.5039(7) <sup>b</sup> |
| Al–E / Å (computed)                          | 1.66                    | 2.24                 | 2.46                   |
| % Difference: computed vs. X-ray bond length | +1.4                    | +1.6                 | –1.8                   |
| % $\Delta d_{AlE}$                           | 6.5 <sup>c</sup>        | 6.6 <sup>d</sup>     | 3.4 <sup>e</sup>       |
| $\Delta\chi_P^f$                             | 1.83                    | 0.94                 | 0.49                   |
| NPA charges ( <i>q</i> )                     | Al +1.93<br>O –1.23     | Al +1.82<br>Se –1.23 | Al +1.78<br>Te –1.19   |
| $\Delta q = q(\text{Al}) - q(\text{E})$      | 3.16                    | 3.05                 | 2.97                   |
| Wiberg Bond Index (WBI)                      | 1.01                    | 1.07                 | 1.09                   |
| <b>Bond Critical Point (BCP) Analysis</b>    |                         |                      |                        |
| $\rho(r)^g$                                  | 0.115                   | 0.068                | 0.061                  |
| $\nabla^2 \rho(r)^h$                         | +0.990                  | +0.183               | +0.089                 |
| $\varepsilon^i$                              | 0.033                   | 0.108                | 0.139                  |

*a* from [K{Al(NON<sup>Dipp</sup>)(O)}]<sub>2</sub>; *b* from K[Al(NON<sup>Dipp</sup>)(Te)(THF)]; *c* using average  $d(\text{Al-O}) = 1.74 \text{ \AA}$  from 35  $\times$  Al-OH bonds; *d* using average  $d(\text{Al-Se}) = 2.36 \text{ \AA}$  from 9  $\times$  Al-SeH bonds; *e* using average  $d(\text{Al-Te}) = 2.59 \text{ \AA}$  from 4  $\times$  Al-TePh bonds; *f*  $\Delta\chi_P = \chi_P(\text{E}) - \chi_P(\text{Al})$ , where  $\chi_P(\text{Al}) = 1.61$ ,  $\chi_P(\text{O}) = 3.44$ ,  $\chi_P(\text{Se}) = 2.55$ ,  $\chi_P(\text{Te}) = 2.1$ ; *g* electron density associated with the BCP along the Al–E bond path ( $\text{e}\text{\AA}^{-3}$ ); *h* Laplacian of the electron density ( $\text{e}\text{\AA}^{-5}$ ); *i* ellipticities ( $\varepsilon$ ).

**Table S2** Molecular Orbital Coefficients for HOMO and HOMO–1 of K[Al(NON<sup>Dipp</sup>)(E)] (E = O, Se, Te)

| Complex                         | Atom | Atomic Orbital         | HOMO-1          | HOMO            |
|---------------------------------|------|------------------------|-----------------|-----------------|
| K[Al(NON <sup>Dipp</sup> )(O)]  | O    | 2 <i>p<sub>x</sub></i> | <b>-0.32153</b> | <b>0.43893</b>  |
|                                 |      | 2 <i>p<sub>y</sub></i> | <b>0.35718</b>  | <b>0.33719</b>  |
|                                 |      | 2 <i>p<sub>z</sub></i> | <b>-0.24282</b> | 0.04177         |
|                                 |      | 3 <i>p<sub>x</sub></i> | <b>-0.23005</b> | <b>0.31385</b>  |
|                                 |      | 3 <i>p<sub>y</sub></i> | <b>0.26297</b>  | <b>0.24063</b>  |
|                                 |      | 3 <i>p<sub>z</sub></i> | <b>-0.16609</b> | 0.02241         |
|                                 | Al   | 4 <i>p<sub>x</sub></i> | <b>-0.12337</b> | <b>0.10408</b>  |
|                                 |      | 4 <i>p<sub>y</sub></i> | 0.00758         | 0.01487         |
|                                 |      | 4 <i>p<sub>z</sub></i> | <b>-0.09904</b> | 0.03581         |
| K[Al(NON <sup>Dipp</sup> )(Se)] | Se   | 3 <i>p<sub>x</sub></i> | <b>0.46389</b>  | <b>0.29125</b>  |
|                                 |      | 3 <i>p<sub>y</sub></i> | <b>-0.19724</b> | <b>0.42146</b>  |
|                                 |      | 3 <i>p<sub>z</sub></i> | <b>0.20287</b>  | <b>-0.19510</b> |
|                                 |      | 4 <i>p<sub>x</sub></i> | <b>-0.33246</b> | <b>-0.20979</b> |
|                                 |      | 4 <i>p<sub>y</sub></i> | <b>-0.14881</b> | <b>-0.29935</b> |
|                                 |      | 4 <i>p<sub>z</sub></i> | <b>-0.13505</b> | <b>0.14318</b>  |
|                                 | Al   | 3 <i>p<sub>x</sub></i> | <b>0.07791</b>  | 0.02196         |
|                                 |      | 3 <i>p<sub>y</sub></i> | -0.06168        | <b>0.07524</b>  |
|                                 |      | 4 <i>p<sub>z</sub></i> | <b>0.07005</b>  | 0.00638         |
| K[Al(NON <sup>Dipp</sup> )(Te)] | Te   | 3 <i>p<sub>x</sub></i> | -0.05363        | <b>0.45839</b>  |
|                                 |      | 3 <i>p<sub>y</sub></i> | <b>0.43911</b>  | 0.05422         |
|                                 |      | 4 <i>p<sub>x</sub></i> | -0.05107        | <b>0.45873</b>  |
|                                 |      | 4 <i>p<sub>y</sub></i> | <b>0.44517</b>  | 0.05602         |
|                                 |      | 5 <i>p<sub>x</sub></i> | -0.01903        | <b>0.11185</b>  |
|                                 |      | 5 <i>p<sub>y</sub></i> | <b>0.10200</b>  | 0.00560         |
|                                 | Al   | 4 <i>p<sub>x</sub></i> | 0.02520         | <b>-0.07428</b> |
|                                 |      | 4 <i>p<sub>y</sub></i> | <b>-0.15097</b> | 0.00216         |

NOTE: NBO Molecular Orbital Coefficients greater than ±0.07 are emphasised (in bold font).

## References

- [S1] R. J. Schwamm, M. D. Anker, M. Lein and M. P. Coles, *Angew. Chem. Int. Ed.*, 2019, **58**, 1489-1493.
- [S2] R. Blessing, *Acta Crystallogr.* 1995, **A51**, 33-38.
- [S3] G. Sheldrick, *Acta Crystallogr.* 2008, **A64**, 112-122.
- [S4] SHELXL-97, G. M. Sheldrick, University of Gottingen, Germany, (1997).
- [S5] L. Farrugia, *J. Appl. Cryst.* 1999, **32**, 837-838.
- [S6] Gaussian 16 Rev. C.01, M. J. Frisch, G. W. Trucks, H. B. Schlegel, G. E. Scuseria, M. A. Robb, J. R. Cheeseman, G. Scalmani, V. Barone, G. A. Petersson, H. Nakatsuji, X. Li, M. Caricato, A. V. Marenich, J. Bloino, B. G. Janesko, R. Gomperts, B. Mennucci, H. P. Hratchian, J. V. Ortiz, A. F. Izmaylov, J. L. Sonnenberg, Williams, F. Ding, F. Lipparini, F. Egidi, J. Goings, B. Peng, A. Petrone, T. Henderson, D. Ranasinghe, V. G. Zakrzewski, J. Gao, N. Rega, G. Zheng, W. Liang, M. Hada, M. Ehara, K. Toyota, R. Fukuda, J. Hasegawa, M. Ishida, T. Nakajima, Y. Honda, O. Kitao, H. Nakai, T. Vreven, K. Throssell, J. A. Montgomery Jr., J. E. Peralta, F. Ogliaro, M. J. Bearpark, J. J. Heyd, E. N. Brothers, K. N. Kudin, V. N. Staroverov, T. A. Keith, R. Kobayashi, J. Normand, K. Raghavachari, A. P. Rendell, J. C. Burant, S. S. Iyengar, J. Tomasi, M. Cossi, J. M. Millam, M. Klene, C. Adamo, R. Cammi, J. W. Ochterski, R. L. Martin, K. Morokuma, O. Farkas, J. B. Foresman, D. J. Fox, Wallingford, CT, (2016)
- [S7] D. Andrae, U. Häußermann, M. Dolg, H. Stoll, H. Preuß, *Theor. Chim. Acta* **1990**, *77*, 123-141.
- [S8] a) P. C. Hariharan, J. A. Pople, *Theor. Chim. Acta* **1973**, *28*, 213-222; b) W. J. Hehre, R. Ditchfield, J. A. Pople, *J. Chem. Phys.* **1972**, *56*, 2257-2261.
- [S9] a) A. D. Becke, *Phys. Rev. A*, **1988**, *38*, 3098-3100; b) J. P. Perdew, *Phys. Rev. B*, **1986**, *33*, 8822-8824.
- [S10] AIMAll (Version 13.02.26, Professional), Keith, T. A.; Gristmill, T. K. Software, Overland Park KS, USA, 2015 (aim.tkgristmill.com).

**Cartesian Coordinates and Computed Energies**  
**(in Hartrees)**

[1-O]<sup>-</sup>

SCF (BP86) Energy = -1364.81348569

Enthalpy 0K = -1364.145631

Enthalpy 298K = -1364.100318

Free Energy 298K = -1364.222794

Lowest Frequency = 13.7467 cm<sup>-1</sup>

Second Frequency = 16.7767 cm<sup>-1</sup>

O 0.00007 -0.00029 -2.50696  
Si -1.40748 -0.65413 1.97101  
Si 1.40754 0.65395 1.97111  
Al -0.00000 -0.00013 -0.84545  
O -0.00010 0.00012 2.66607  
N -1.50529 -0.15337 0.28378  
N 1.50525 0.15331 0.28383  
C -2.79762 0.04297 -0.31256  
C -3.40993 1.33621 -0.27109  
C -4.69011 1.51668 -0.82625  
H -5.15518 2.50900 -0.79001  
C -5.37492 0.45794 -1.43600  
H -6.37336 0.61429 -1.86139  
C -4.75710 -0.79473 -1.51837  
H -5.27261 -1.61650 -2.02995  
C -3.47811 -1.02561 -0.97437  
C -2.64018 2.53691 0.27657  
H -1.86360 2.13387 0.94972  
C -3.50424 3.52665 1.08216  
H -4.05209 3.01978 1.89570  
H -2.86917 4.31063 1.53254  
H -4.24854 4.04069 0.44661  
C -1.91065 3.25702 -0.88365  
H -2.64181 3.68858 -1.59171  
H -1.27391 4.07841 -0.50526  
H -1.27677 2.55477 -1.45570  
C -2.81066 -2.38370 -1.18604  
H -1.94364 -2.42114 -0.50460  
C -3.73059 -3.57414 -0.84211  
H -4.59248 -3.64254 -1.53116  
H -3.17353 -4.52467 -0.92698  
H -4.13168 -3.50215 0.18499  
C -2.26234 -2.48558 -2.63049  
H -1.52964 -1.67409 -2.82117  
H -1.76291 -3.46121 -2.78397  
H -3.08688 -2.40850 -3.36434  
C -2.89066 -0.03148 2.98146  
H -2.92599 1.06981 2.99953  
H -3.84059 -0.39698 2.55718  
H -2.81375 -0.39102 4.02232  
C -1.27756 -2.53821 2.21615  
H -1.11072 -2.77742 3.28132  
H -2.19775 -3.05168 1.88808  
H -0.43450 -2.95200 1.63737  
C 1.27823 2.53804 2.21636  
H 1.11213 2.77737 3.28163  
H 2.19835 3.05125 1.88768  
H 0.43492 2.95202 1.63808  
C 2.89052 0.03068 2.98147  
H 2.92470 -1.07064 3.00041  
H 3.84060 0.39482 2.55634  
H 2.81459 0.39117 4.02207

C 2.79756 -0.04288 -0.31259  
C 3.47792 1.02581 -0.97437  
C 4.75692 0.79512 -1.51840  
H 5.27234 1.61697 -2.02994  
C 5.37487 -0.45751 -1.43614  
H 6.37333 -0.61371 -1.86156  
C 4.69018 -1.51636 -0.82648  
H 5.15533 -2.50864 -0.79035  
C 3.40999 -1.33606 -0.27126  
C 2.81027 2.38381 -1.18602  
H 1.94321 2.42110 -0.50462  
C 2.26203 2.48562 -2.63050  
H 1.52949 1.67399 -2.82124  
H 1.76242 3.46115 -2.78401  
H 3.08663 2.40869 -3.36430  
C 3.72998 3.57440 -0.84201  
H 4.59192 3.64294 -1.53098  
H 3.17277 4.52483 -0.92692  
H 4.13100 3.50246 0.18513  
C 2.64039 -2.53689 0.27631  
H 1.86370 -2.13397 0.94941  
C 1.91106 -3.25708 -0.88399  
H 2.64235 -3.68851 -1.59201  
H 1.27442 -4.07858 -0.50567  
H 1.27712 -2.55491 -1.45608  
C 3.50454 -3.52650 1.08197  
H 4.05222 -3.01954 1.89556  
H 2.86956 -4.31060 1.53228  
H 4.24898 -4.04041 0.44648

[1-Se]<sup>-</sup>

SCF (BP86) Energy = -1299.02227563

Enthalpy OK = -1298.355901

Enthalpy 298K = -1298.309869

Free Energy 298K = -1298.434151

Lowest Frequency = 13.9919 cm<sup>-1</sup>

Second Frequency = 23.8612 cm<sup>-1</sup>

Se -0.00006 0.00040 -2.91602  
Si -1.40147 -0.65558 2.14590  
Si 1.40147 0.65515 2.14597  
Al -0.00001 0.00011 -0.67263  
O 0.00008 -0.00043 2.85005  
N -1.50994 -0.12454 0.46044  
N 1.50997 0.12448 0.46041  
C -2.81464 0.16876 -0.07642  
C -3.30626 1.51393 -0.05953  
C -4.58549 1.79301 -0.57480  
H -4.95029 2.82712 -0.56451  
C -5.39664 0.78298 -1.10498  
H -6.39127 1.01856 -1.50126  
C -4.91221 -0.52829 -1.13478  
H -5.53233 -1.32239 -1.56874  
C -3.63633 -0.85843 -0.63627  
C -2.44419 2.66706 0.45262  
H -1.62265 2.21204 1.03285  
C -3.20142 3.63285 1.38822  
H -3.67731 3.09790 2.22842  
H -2.50688 4.38245 1.80840  
H -3.99421 4.18825 0.85457  
C -1.81265 3.43574 -0.73261  
H -2.59767 3.91463 -1.34644  
H -1.13109 4.22862 -0.37191  
H -1.24488 2.75750 -1.39491  
C -3.16562 -2.30815 -0.75187  
H -2.17650 -2.36498 -0.26749  
C -4.11506 -3.28629 -0.02378  
H -5.11443 -3.30607 -0.49604  
H -3.71460 -4.31592 -0.05861  
H -4.25831 -3.00899 1.03559  
C -2.97960 -2.71915 -2.23017  
H -2.25334 -2.05112 -2.72514  
H -2.60567 -3.75766 -2.29823  
H -3.93723 -2.66903 -2.78118  
C -2.88834 -0.04972 3.15784  
H -2.93689 1.05115 3.16766  
H -3.83640 -0.42881 2.74176  
H -2.80013 -0.40103 4.20053  
C -1.24347 -2.53856 2.37561  
H -1.00959 -2.76715 3.43035  
H -2.17461 -3.06484 2.10761  
H -0.43093 -2.94712 1.75169  
C 1.24318 2.53805 2.37606  
H 1.00931 2.76639 3.43085  
H 2.17422 3.06452 2.10812  
H 0.43056 2.94663 1.75225  
C 2.88848 0.04932 3.15772  
H 2.93724 -1.05155 3.16730  
H 3.83648 0.42867 2.74171  
H 2.80024 0.40038 4.20050  
C 2.81465 -0.16878 -0.07649  
C 3.63637 0.85850 -0.63616  
C 4.91226 0.52843 -1.13469

H 5.53240 1.32259 -1.56849  
C 5.39667 -0.78286 -1.10506  
H 6.39131 -1.01838 -1.50134  
C 4.58550 -1.79297 -0.57507  
H 4.95030 -2.82708 -0.56491  
C 3.30625 -1.51395 -0.05982  
C 3.16570 2.30825 -0.75146  
H 2.17665 2.36503 -0.26691  
C 2.97948 2.71948 -2.22967  
H 2.25319 2.05149 -2.72465  
H 2.60548 3.75798 -2.29752  
H 3.93704 2.66949 -2.78079  
C 4.11528 3.28625 -0.02335  
H 5.11458 3.30608 -0.49578  
H 3.71483 4.31589 -0.05796  
H 4.25869 3.00877 1.03594  
C 2.44416 -2.66716 0.45213  
H 1.62254 -2.21224 1.03232  
C 1.81278 -3.43574 -0.73325  
H 2.59789 -3.91451 -1.34706  
H 1.13123 -4.22869 -0.37272  
H 1.24504 -2.75745 -1.39554  
C 3.20133 -3.63302 1.38771  
H 3.67705 -3.09813 2.22806  
H 2.50680 -4.38273 1.80769  
H 3.99426 -4.18827 0.85411



**[1-Te]<sup>-</sup>**

SCF (BP86) Energy = -1297.75035738

Enthalpy OK = -1297.084115

Enthalpy 298K = -1297.037955

Free Energy 298K = -1297.162961

Lowest Frequency = 14.8142 cm<sup>-1</sup>

Second Frequency = 22.7364 cm<sup>-1</sup>

Te -0.00023 -0.00565 -2.95518  
Si -1.39736 -0.65662 2.32137  
Si 1.39772 0.66930 2.31741  
Al 0.00011 -0.00069 -0.49506  
O 0.00079 0.00714 3.02388  
N -1.51245 -0.12098 0.63556  
N 1.51289 0.12449 0.63460  
C -2.81871 0.18640 0.10772  
C -3.29179 1.53830 0.11668  
C -4.56963 1.83110 -0.39464  
H -4.91854 2.87080 -0.39195  
C -5.39876 0.82865 -0.91026  
H -6.39165 1.07519 -1.30404  
C -4.93500 -0.49019 -0.92705  
H -5.57075 -1.27983 -1.34613  
C -3.66081 -0.83451 -0.43401  
C -2.41988 2.68621 0.62402  
H -1.58048 2.22479 1.17246  
C -3.15755 3.62721 1.60041  
H -3.60299 3.07242 2.44429  
H -2.45799 4.37606 2.01358  
H -3.97162 4.18311 1.10049  
C -1.82728 3.48526 -0.56071  
H -2.63148 3.97092 -1.14353  
H -1.14277 4.27596 -0.20098  
H -1.27144 2.82643 -1.25138  
C -3.22304 -2.29658 -0.52354  
H -2.21622 -2.35993 -0.07778  
C -4.16508 -3.22639 0.27526  
H -5.18210 -3.23527 -0.15799  
H -3.79143 -4.26658 0.26105  
H -4.26070 -2.90966 1.32882  
C -3.10941 -2.76606 -1.99143  
H -2.75571 -3.81282 -2.03487  
H -4.08875 -2.72079 -2.50302  
H -2.39588 -2.13255 -2.54610  
C -2.88637 -0.06262 3.33623  
H -2.93663 1.03797 3.35638  
H -3.83335 -0.43931 2.91557  
H -2.79848 -0.42356 4.37565  
C -1.22460 -2.53845 2.54767  
H -0.97114 -2.76303 3.59870  
H -2.15700 -3.07060 2.29717  
H -0.42067 -2.94402 1.91103  
C 1.22279 2.55218 2.53296  
H 0.96910 2.78267 3.58265  
H 2.15470 3.08376 2.27936  
H 0.41853 2.95329 1.89391  
C 2.88768 0.08258 3.33506  
H 2.93987 -1.01783 3.36010  
H 3.83407 0.45899 2.91281  
H 2.79907 0.44799 4.37285  
C 2.81888 -0.18688 0.10856  
C 3.66243 0.83051 -0.43748  
C 4.93636 0.48238 -0.92851

H 5.57324 1.26933 -1.35091  
C 5.39843 -0.83697 -0.90561  
H 6.39114 -1.08655 -1.29794  
C 4.56786 -1.83605 -0.38573  
H 4.91546 -2.87616 -0.37819  
C 3.29024 -1.53932 0.12386  
C 3.22640 2.29268 -0.53369  
H 2.21945 2.35908 -0.08867  
C 3.11377 2.75571 -2.00371  
H 2.39942 2.12074 -2.55564  
H 2.76162 3.80279 -2.05197  
H 4.09316 2.70668 -2.51487  
C 4.16908 3.22496 0.26141  
H 5.18646 3.23045 -0.17106  
H 3.79683 4.26558 0.24202  
H 4.26343 2.91308 1.31654  
C 2.41674 -2.68373 0.63633  
H 1.57742 -2.21862 1.18177  
C 1.82417 -3.48819 -0.54475  
H 2.62825 -3.97759 -1.12459  
H 1.13863 -4.27638 -0.18148  
H 1.26941 -2.83230 -1.23907  
C 3.15272 -3.62041 1.61813  
H 3.59780 -3.06172 2.45962  
H 2.45217 -4.36659 2.03445  
H 3.96682 -4.17946 1.12178
